# Supplementary material
Source: PubMed Central journal article supplement (PMC5841207)
Supplement: supplementary_tables_awx247.pdf [file supplementary_tables_awx247.pdf]

**Supplementary Table 1.** Detailed imaging parameters.

|                                                   | Ultra-high gradient strength MRI                                                |                    |                          |                                  | Ultra-high field strength MRI                                  |
|---------------------------------------------------|---------------------------------------------------------------------------------|--------------------|--------------------------|----------------------------------|----------------------------------------------------------------|
| Scanner, field and gradient strength              | Siemens MAGNETOM Skyra CONNECTOM, 3 T, $G_{\max}$ 300 mT/m, slew rate 200 T/m/s |                    |                          |                                  | Siemens MAGNETOM, 7 T, $G_{\max}$ 80 mT/m, slew rate 800 T/m/s |
| Sequence                                          | <i>3D MEMPRAGE</i>                                                              | <i>3D T2 SPACE</i> | <i>3D T2 SPACE FLAIR</i> | <i>2D single-shot EPI</i>        | <i>2D FLASH</i>                                                |
| Resolution (mm)                                   | 1.0 isotropic                                                                   | 1.0 isotropic      | 1.0 isotropic            | 1.5 isotropic                    | $0.33 \times 0.33 \times 1.0$ , 25 % gap                       |
| Number of slices                                  | 176                                                                             | 176                | 176                      | 96                               | 40+40 slices (5 overlapping)                                   |
| Flip angle (°)                                    | 7                                                                               | T2 variable        | T2 variable              | 90                               | 55                                                             |
| Echo/repetition/inversion times (ms)              | 1.15, 3.03, 4.89, 6.75 / 2530 / 1100                                            | 560 / 3200 / -     | 393 / 5000 / 1800        | 57 / 8800 / -                    | 21.8 / 1700 / -                                                |
| Diffusion encoding b-value (s/mm <sup>2</sup> )*, | -                                                                               | -                  | -                        | 15 b0, 1000, 64 / 5000, 128; 140 | -                                                              |

|                                 |          |          |            |               |          |
|---------------------------------|----------|----------|------------|---------------|----------|
| directions; EPI factor          |          |          |            |               |          |
| Acceleration:                   | 2, 32; - | 2, 32; - | 2, 24; 7/8 | 3, 84; 6/8    | 2, 32; - |
| GRAPPA factor, reference lines; |          |          |            |               |          |
| Partial Fourier                 |          |          |            |               |          |
| Acquisition time (min)          | 6:02     | 4:46     | 6:32       | 11:44 / 21:51 | 15:14    |

EPI = echo planar imaging; FLAIR = fluid-attenuation inversion recovery; FLASH = fast low-angle shot T<sub>2</sub>\*-weighted spoiled gradient-echo; GRAPPA = generalized auto-calibrating partially parallel acquisitions; MEMPRAGE = multi-echo magnetization-prepared rapid gradient-echo; T<sub>2</sub>-weighted sampling perfection with application optimized contrasts using different flip angle evolution (T2-SPACE). \*Diffusion gradient pulse duration/diffusion time ( $\delta/\Delta$ ): 12.9/21.8 ms; gradient amplitude: G = 62 mT/m for b = 1000 s/mm<sup>2</sup>, G = 146 mT/m for b = 5000 s/mm<sup>2</sup>.

**Supplementary Table 2.** Scan-rescan reproducibility of diffusion metrics in four healthy subjects.

|                                                               |                               | <b>Intracellular</b>   | <b>Isotropic</b>       | <b>Orientation</b>      | <b>Fractional</b> | <b>Mean</b>        |
|---------------------------------------------------------------|-------------------------------|------------------------|------------------------|-------------------------|-------------------|--------------------|
|                                                               |                               | <b>volume fraction</b> | <b>volume fraction</b> | <b>dispersion index</b> | <b>anisotropy</b> | <b>diffusivity</b> |
| <b>Cortex at mid-cortical depth</b><br><b>(surface-based)</b> | Mean $\pm$ standard deviation | 0.425 $\pm$ 0.046      | 0.024 $\pm$ 0.003      | 0.543 $\pm$ 0.057       | 0.184 $\pm$ 0.039 | 0.805 $\pm$ 0.010  |
|                                                               | Absolute difference           | 0.0065                 | 0.0036                 | 0.0080                  | 0.0056            | 0.0145             |
|                                                               | Coefficient of variation      | 1.09%                  | 10.5%                  | 1.04%                   | 2.14%             | 1.26%              |
| <b>Cortex (volume-based)</b>                                  | Mean $\pm$ standard deviation | 0.432 $\pm$ 0.004      | 0.116 $\pm$ 0.004      | 0.530 $\pm$ 0.005       | 0.191 $\pm$ 0.003 | 0.842 $\pm$ 0.010  |
|                                                               | Absolute difference           | 0.0058                 | 0.0063                 | 0.0066                  | 0.0044            | 0.0140             |
|                                                               | Coefficient of variation      | 0.96%                  | 3.70%                  | 0.87%                   | 1.60%             | 1.17%              |
| <b>White matter</b><br><b>(volume-based)</b>                  | Mean $\pm$ standard deviation | 0.635 $\pm$ 0.006      | 0.149 $\pm$ 0.019      | 0.305 $\pm$ 0.002       | 0.428 $\pm$ 0.005 | 0.767 $\pm$ 0.018  |
|                                                               | Absolute difference           | 0.0084                 | 0.0264                 | 0.0025                  | 0.0074            | 0.0258             |
|                                                               | Coefficient of variation      | 0.95%                  | 12.4%                  | 0.57%                   | 1.23%             | 2.36%              |

Mean diffusivity reported as  $\mu\text{m}^2/\text{s}$ . All values were calculated per subject and are reported as the average across all four healthy controls. Surface-based metrics were extracted as the mean value at mid-cortical depth and then averaged across the left and right hemisphere. Mean  $\pm$  standard

deviation was calculated across Scan 1 and Scan 2. The absolute difference was calculated as:  $|\text{Scan 1} - \text{Scan 2}|$ . The within-subject coefficient of variation was calculated according to the following equation:  $\text{Standard deviation (Scan 1, Scan 2)} / \text{Mean (Scan 1, Scan 2)}$ .
