# Supplementary material
Source: PubMed Central journal article supplement (PMC5841207)

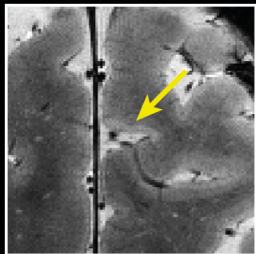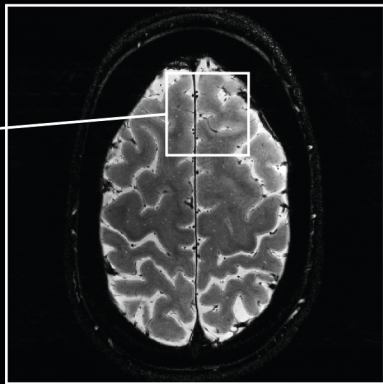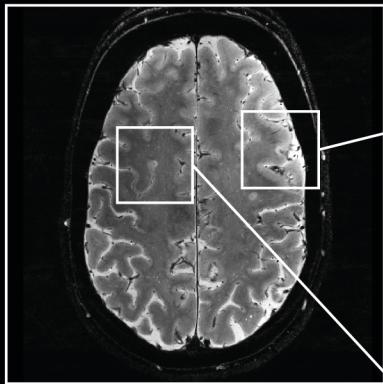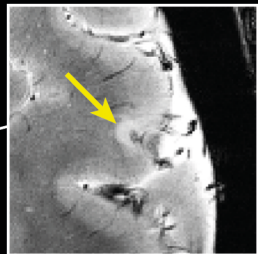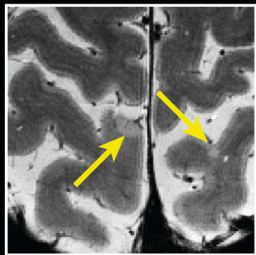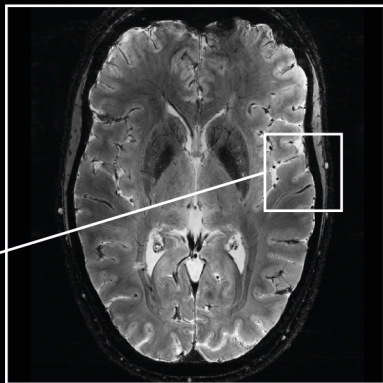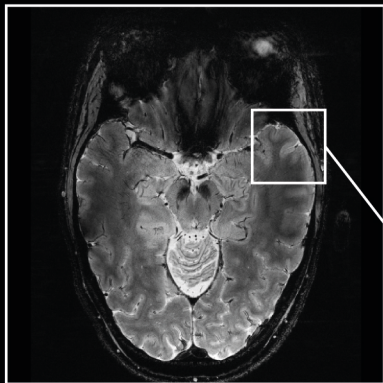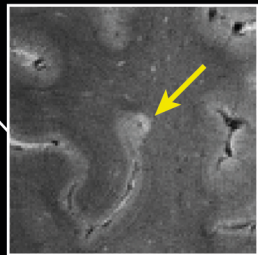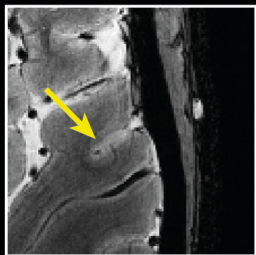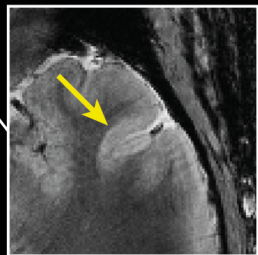

Supplement: brain-2016-02069-file008_awx247.pdf [file brain-2016-02069-file008_awx247.pdf]
